# Supplementary material
Source: PubMed Central journal article supplement (PMC3868418)
Supplement: supp_the2013-0093_Brandi-13-93.pdf [file supp_the2013-0093_Brandi-13-93.pdf]

## Overview

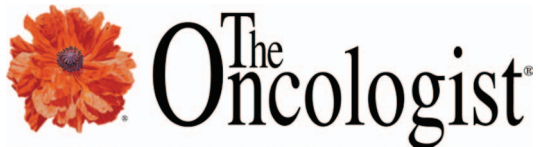

The official journal of the Society for Translational Oncology

**First Published Online November 13, 2013**

**DOI:** 10.1634/theoncologist.2013-0093

**Title:** Metronomic Capecitabine in Advanced Hepatocellular Carcinoma Patients: A Phase II Study

**Authors:** Giovanni Brandi<sup>a</sup>, Francesco de Rosa<sup>a</sup>, Valentina Agostini<sup>a</sup>, Stefania di Girolamo<sup>a</sup>, Pietro Andreone<sup>b</sup>, Luigi Bolondi<sup>b</sup>, Carla Serra<sup>c</sup>, Claudia Sama<sup>b</sup>, Rita Golfieri<sup>c</sup>, Annagiulia Gramenzi<sup>b</sup>, Alessandro Cucchetti<sup>b</sup>, Antonio Daniele Pinna<sup>b</sup>, Franco Trevisani<sup>b</sup>, Guido Biasco<sup>a</sup>, for the ITALIAN LIVER CANCER (ITA.LI.CA) GROUP

<sup>a</sup>Department of Experimental, Diagnostic and Specialty Medicine, Sant'Orsola-Malpighi Hospital, Bologna, Italy

<sup>b</sup>Department of Medical and Surgical Sciences, University of Bologna, Sant'Orsola-Malpighi Hospital, Bologna, Italy

<sup>c</sup>Department of Digestive Diseases and Internal Medicine, Sant'Orsola-Malpighi Hospital, Bologna, Italy

**Agenzia Italianadel Farmaco Identifier:** EudraCT 2008-002299-92

**Sponsor(s):** Azienda Ospedaliera di Bologna Policlinico Sant'Orsola M. Malpighi (54/2008/U/Sper)

**Principal Investigator:** Giovanni Brandi

**IRB Approved:** Yes

### Disclosures:

**Rita Golfieri:** Honoraria Received: Bayer

**Luigi Bolondi:** Consultant/Advisory Role: Bayer, BMS; Honoraria Received: Bayer, Esaote, BMS, Bracco; Research Funding/Contracted Research: Bayer, BMS

**Giovanni Brandi, Francesco de Rosa, Valentina Agostini, Stefania di Girolamo, Pietro Andreone, Carla Serra, Claudia Sama, Annagiulia Gramenzi, Alessandro Cucchetti, Antonio Daniele Pinna, Franco Trevisani, G. Biasco:** None reported

## Author Summary: Abstract and Brief Discussion

### Background

Antiangiogenic treatment with targeted agents is effective in advanced hepatocellular carcinoma (HCC). This trial evaluated the safety and efficacy of metronomic capecitabine in patients with HCC.

### Methods

This single-institution phase II trial included 59 previously untreated patients with advanced HCC and 31 patients resistant to or intolerant of sorafenib. The treatment schedule was capecitabine 500 mg twice daily until progression of disease, unacceptable toxicity level, or withdrawal of informed consent. Progression-free survival (PFS) was chosen as the primary endpoint.

### Results

A total of 59 previously untreated and 31 previously treated patients with HCC were enrolled. The first cohort achieved a median PFS of 6.03 months and an overall survival (OS) of 14.47 months. Two patients achieved a complete response, 1 patient achieved partial response, and in 30 patients, stable disease was the best outcome. The second cohort achieved a median PFS of 3.27 months and a median OS of 9.77 months. No complete or partial responses were observed, but 10 patients had stable disease. An unscheduled comparison of the first cohort of patients with 3,027 untreated patients with HCC from the Italian Liver Cancer (ITA.LI.CA) database was performed. One-to-one matching according to demographic/

etiologic/oncologic features was possible for 50 patients. The median OS for these 50 capecitabine-treated patients was 15.6 months, compared with a median OS of 8.0 months for the matched untreated patients ( $p = .043$ ).

## Conclusion

Metronomic capecitabine is well tolerated by patients with advanced HCC and appears to have activity both in treatment-naïve patients and in those previously treated with sorafenib.

## Discussion

In patients treated with first-line metronomic capecitabine, the median progression-free survival, which was our primary outcome measure, was >6 months, much longer than the 2.5 months reported for historical control patients. A median overall survival OS of 14.5 months (Fig. 1) is also encouraging, and interestingly, was not different for the 26 patients classified Barcelona-Clinic Liver Cancer (BCLC)-B and 33 patients classified BCLC-C. Median survival time of previously untreated patients was nearly double that of patients undergoing palliation, who were individually matched from the ITA.LI.CA database (15.6 vs. 8.0 months, respectively) (Fig. 2), providing further support for the usefulness of capecitabine. This comparison has several biases, and therefore the results should be considered with caution. Caution should also be applied when comparing our survival data with the lower survival rates reported by the Sorafenib Hepatocellular Carcinoma Assessment Randomized Protocol (SHARP) and the Asia-Pacific trials because of the different characteristics of the study populations. Results of the SHARP and Asia-Pacific trials were not available when our trial was designed. Those trials demonstrated a survival advantage for sorafenib, now considered standard treatment for advanced hepatocellular carcinoma HCC. However, the absolute advantage is still unsatisfactory (2.8 months among Western patients and 2.3 months among Asian patients) and is achieved at the expense of frequent toxicity. In fact, as many as 38% of patients discontinue treatment because of adverse events, and approximately 26% of patients require a dose reduction. In addition to the better disease control and survival rates, metronomic capecitabine also has a rather low toxicity profile. In fact, no treatment-related deaths were observed, and no patient withdrew from treatment because of adverse events. Most adverse effects were mild or moderate and were manageable with supportive care or a brief drug-free period. Although the toxicity rate among the first- and second-line cohorts seems similar, the efficacy was remarkably lower in the second-line setting. However, a median OS of approximately 10 months obtained in the second-line setting is an interesting result. In conclusion, metronomic capecitabine is safe and is associated with promising results in both treatment-naïve and pretreated patients with advanced HCC who have preserved liver function.

## Trial Information

|                                      |                           |
|--------------------------------------|---------------------------|
| <b>Disease:</b>                      | Hepatocellular carcinoma  |
| <b>Stage of disease / treatment:</b> | Metastatic / Advanced     |
| <b>Prior Therapy:</b>                | None                      |
| <b>Type of study - 1:</b>            | Phase II                  |
| <b>Type of study - 2:</b>            | Single Arm                |
| <b>Primary Endpoint:</b>             | Progression Free Survival |
| <b>Secondary Endpoint:</b>           | Overall Survival          |

### Additional Details of Endpoints or Study Design:

This was a single center, uncontrolled, phase II clinical trial including patients with advanced HCC defined by either vascular invasion or metastatic spread. All patients were either not candidates for or refractory to locoregional treatments. Based on these characteristics, patients belonging to Barcelona Clinic Liver Cancer (BCLC)-C and BCLC-B stage were enrolled. Histological confirmation of diagnosis was not mandatory, provided that American Association for the Study of Liver Diseases 2005 diagnostic criteria were fulfilled [1]. Other main inclusion criteria were: Eastern Cooperative Oncology Group performance status 0 or 1; Child-Pugh class A; life expectancy of at least three months; adequate hematological (hemoglobin  $\geq 8.5$ g per deciliter; platelet  $\geq 60 \times 10^9$  per liter; ANC  $1.0 \times 10^3$ /microliter), hepatic (total bilirubin  $\leq 3.0$  per deciliter; ALT/AST  $\leq 5 \times$  upper limit of normal [ULN]; INR  $\leq 1.5$ ) and renal functions (serum creatinine  $\leq 1.2 \times$  ULN). Any previous systemic treatment for HCC was also an exclusion criterion. Table 1 describes the characteristics of first-line patients. This requisite was amended after sorafenib had become available to allow inclusion of patients either

resistant to or intolerant of this drug, provided that they had been drug-free for at least 14 days at study entry. Primary objective was treatment efficacy, and progression-free survival (PFS) was chosen as primary outcome measure. The study was not designed on response rate because the investigators felt that antiangiogenic treatments, such as sorafenib [2] are more prone to induce RECIST-defined disease stabilization rather than objective response, so a conventional study design based on tumor response could result in a high probability to miss the endpoint. Secondary objectives were: objective response rate (ORR = complete + partial responses), evaluated per RECIST 1.0 criteria; overall survival (OS); and safety (type, incidence and severity of adverse events [AEs] reported). Tumor assessment was performed at baseline and, subsequently, every three months with multiphase spiral computed tomography (CT) scan or magnetic resonance imaging (MRI). Throughout the study, each lesion was followed-up with the same imaging technique employed at baseline. All the patients who received at least one dose of capecitabine and underwent restaging CT scan after three months or had progressed before were considered evaluable for efficacy (intention-to-treat analysis). Tolerability of this therapeutic schedule was known, thus a formal two-stages design was deemed unnecessary. As an additional safety measure, however, early study termination in case of observation of severe toxicity in more than five patients out of the first fifteen enrolled was scheduled. The primary endpoint of the study, PFS, is defined as the time elapsed from treatment initiation to disease progression or death. At the time of study design, although no systemic treatment with proven efficacy for HCC was available, doxorubicin was commonly used in clinical practice. Therefore, based on the phase III clinical trial by Gish and colleagues [3], a median PFS of 10 weeks for patients treated with doxorubicin was assumed as the result achievable with a systemic anticancer treatment, and an increase in median PFS  $\geq 4$  weeks was considered as clinically significant. For sample size calculation we assumed: (a) a one-sided alpha error of 0.05; (b) an accrual period of 27 months; (c) a follow-up period of 9 months; (d) the outcome (PFS) to be exponentially distributed. Under these assumptions, a sample size of 54 patients would ensure a power of at least 0.80 to detect an increase in median PFS of at least 4 weeks [4]. Considering a drop-out proportion of 10%, the trial was aimed at recruiting 60 patients. The trial also included an explorative study enrolling additional 30 patients in whom sorafenib treatment had failed (second-line cohort). This sample size was empirically determined. Table 2 summarizes the characteristic of second line patients. Patients' survival was estimated by Kaplan-Meier method and differences between subgroups compared with the log-rank test. A p-value of less than 0.05 was considered statistically significant in all analyses. To further investigate the impact of metronomic capecitabine on OS, an unscheduled comparison with an untreated population from the database of the Italian Liver Cancer (ITA.LI.CA) database, including 3027 HCC patients [5], was performed. Of these, 369 cases belonging to the BCLC intermediate or advanced stage [1] were initially considered for possible match with patients receiving metronomic capecitabine as first-line treatment. Further selection criteria were: treatment with palliative care, tamoxifen or other systemic drugs excluding sorafenib; Child-Pugh liver function class A; availability of complete clinical and tumour data. Eventually, 156 patients were available for matching. Match was possible for 50 patients, leading to a covariate distribution very similar between the two groups, especially as far as tumour characteristics is concerned (Table 3). **Treatment:** Patients received capecitabine 500 mg twice daily after meals, approximately every twelve hours. Drug administration was continuous, i.e. no drug-free periods were planned. Due to the low dose, no adjustments were allowed. In case of severe toxicity, defined as grade 3 or 4 by National Cancer Institute Common Toxicity Criteria for Adverse Events 3.0, a treatment interruption until improvement to grade 1 was required. If toxicity recurred at retreatment or failed to improve within two weeks, the patient was withdrawn from the study. Capecitabine administration was terminated in case of tumor progression at imaging, or worsening of hepatic function, defined as an increase of total bilirubin above 3 mg/dl or progression of liver failure to Child-Pugh score C. Concomitant treatment with sorivudine and other related agents, phenytoin, allopurinol, and coumarin-derived anticoagulants was not allowed during study. The use of medications and procedures potentially effective on HCC, including palliative radiotherapy were also not allowed. Prophylaxis of HBV reactivation with lamivudine or other antivirals was mandatory. The trial started in June 2008. After the first 15 patients had been evaluable for toxicity, four cases of grade 3 adverse events were observed. Therefore, enrollment continued until the planned sample size was achieved in December 2010. The data were considered ready for final analysis on September 15th, 2011.

**Investigator's Analysis:**

Active and should be pursued further

## Drug Information

### Drug 1:

|                             |                                    |
|-----------------------------|------------------------------------|
| Generic/Working name:       | Capecitabine                       |
| Trade name:                 | Xeloda                             |
| Company name:               | Roche                              |
| Drug type:                  | Other                              |
| Drug class:                 | Antimetabolite                     |
| Dose:                       | 1000 milligrams (mg) per flat dose |
| Route:                      | oral (po)                          |
| Schedule of Administration: | 500mg twice daily continuously     |

## Patient Characteristics

|                                      |                                                                                                                                                                                                                                                                                                                                                 |
|--------------------------------------|-------------------------------------------------------------------------------------------------------------------------------------------------------------------------------------------------------------------------------------------------------------------------------------------------------------------------------------------------|
| Number of patients, male:            | 73                                                                                                                                                                                                                                                                                                                                              |
| Number of patients, female:          | 17                                                                                                                                                                                                                                                                                                                                              |
| Stage:                               | advanced disease: first-line BCLC-B (26 pts) and BCLC-C (33 pts); second-line BCLC-B (15 pts) and BCLC-C (16 pts)                                                                                                                                                                                                                               |
| Age:                                 | Median (range): 68 (44–88) first-line; 71(37–86) second-line                                                                                                                                                                                                                                                                                    |
| Number of prior systemic therapies:  | Median (range): 0 (first.line); 1 (second-line)                                                                                                                                                                                                                                                                                                 |
| Performance Status:                  | ECOG <ul style="list-style-type: none"><li>● 0—27 (first-line); 13 (second-line)</li><li>● 1—32 (first-line); 18 (second-line)</li><li>● 2—0</li><li>● 3—0</li></ul>                                                                                                                                                                            |
| Other:                               | This trial also included an explorative study which planned to enroll an additional 30 patients in whom sorafenib treatment had failed (second-line cohort). Finally, 31 patients received metronomic capecitabine as second-line systemic treatment after sorafenib failure. The complete characteristics of patients are reported in Table 2. |
| Cancer Types or Histologic Subtypes: | hepatocellular carcinoma: 90                                                                                                                                                                                                                                                                                                                    |

## Primary Assessment Method

### Experimental Arm: Hepatocellular Carcinoma

|                                            |                                             |
|--------------------------------------------|---------------------------------------------|
| Number of patients screened:               | 130                                         |
| Number of patients enrolled:               | 90                                          |
| Number of patients evaluable for toxicity: | 90 (59 in first-line and 31 in second-line) |
| Number of patients evaluated for efficacy: | 87 (58 in first-line and 29 in second-line) |
| Evaluation method:                         | RECIST 1.0                                  |
| Response assessment CR:                    | 3.44% first-line; 0% second-line%           |
| Response assessment PR:                    | 1.72% first-line; 0% second-line%           |
| Response assessment SD:                    | 51.7% first-line; 34.4% second-line%        |
| Response assessment PD:                    | 43.1% first-line; 65.5% second-line %       |
| Response assessment other:                 |                                             |

|                                                             |                                                                                                    |
|-------------------------------------------------------------|----------------------------------------------------------------------------------------------------|
| <b>(Median) duration assessments PFS:</b>                   | first-line: 6.03; second-line: 3.27 months, CI: (first-line 3.43-8.37; second-line: 2.93-3.97)     |
| <b>(Median) duration assessments TTP:</b>                   | na                                                                                                 |
| <b>(Median) duration assessments OS:</b>                    | first-line: 14.47; second-line: 9.77 months, CI: (first-line: 10.53-17.13;second-line: 5.57-16.27) |
| <b>(Median) duration assessments response duration:</b>     |                                                                                                    |
| <b>(Median) duration assessments duration of treatment:</b> |                                                                                                    |
| <b>Experimental Arm: Total Patient Population:</b>          |                                                                                                    |
| <b>Number of patients screened:</b>                         |                                                                                                    |
| <b>Number of patients enrolled:</b>                         |                                                                                                    |
| <b>Number of patients evaluable for toxicity:</b>           |                                                                                                    |
| <b>Number of patients evaluated for efficacy:</b>           |                                                                                                    |
| <b>Evaluation method:</b>                                   | Other                                                                                              |

## Adverse Events

| Name | *NC/NA                                    | 1 | 2 | 3 | 4 | 5 | All Grades |
|------|-------------------------------------------|---|---|---|---|---|------------|
|      | *No Change from Baseline/No Adverse Event |   |   |   |   |   |            |

## Assessment, Analysis, and Discussion

|                                             |                                      |
|---------------------------------------------|--------------------------------------|
| <b>Completion:</b>                          | Study completed                      |
| <b>Pharmacokinetics / Pharmacodynamics:</b> | Not Collected                        |
| <b>Investigator's Assessment:</b>           | Active and should be pursued further |

### Discussion

In patients treated with first-line metronomic capecitabine, the median progression-free survival (PFS) was >6 months, much longer than the 2.5 months reported for historical control patients [3]. We believe that these results are successful. As expected for antiangiogenic treatments, the overall response rate was low, but the observation of two complete, long-lasting, responses with dimensional criteria such as RECIST is a further proof of the anticancer activity of metronomic capecitabine. In terms of both PFS and disease-control rate, our results are in line with those previously reported in a small group of HCC patients [6].

The overall survival (OS) observed (median of 14.5 months) is also encouraging and, interestingly, it was not different among BCLC-B and C patients. In segregated patients according to BCLC stage, median OS of the 26 BCLC-B patients was 14.47 months (95% C.I.: 10.47–18.47 months) and 15.50 months (95% C.I.: 8.66–22.34 months) for the 33 BCLC-C patients. Such a difference was not statistically significant ( $p = 0.321$ ). This is understandable, considering that we enrolled BCLC-B patients not amenable to locoregional therapies, representing a subset with poorest prognosis among the heterogeneous group of patients with intermediate-stage HCC. Additional evidence supporting the usefulness of capecitabine is provided by the finding that the median survival of treated patients almost doubled with respect to that of individually matched patients undergoing palliation. This comparison suffers from some biases and should be considered with caution. Caution should also be applied when comparing our survival data with the lower survival rates reported by the SHARP [7] and Asia-Pacific [8] trials, due to the different characteristics of the study populations. The use of sorafenib after capecitabine failure does not confer any benefit in terms of survival. Actually, 13 patients received sorafenib upon progression as second-line treatment, with no response, except a single one, and the median OS for 46

patients treated with capecitabine only was 15.9 months (95% CI: 8.77–23.09) while it was 12.2 months (95% CI: 11.01–13.46) for 13 patients treated with sorafenib in the second line ( $p = 0.39$ ).

The efficacy of capecitabine as a second-line drug was lower. In fact, no ORR was observed, and PFS and OS were shorter than in the first-line cohort. Such a declining efficacy is, however, expected in a population with a poorer prognosis, and a median OS of about 10 months in these patients remains an interesting result, being similar to what was achieved, after failure of antiangiogenic treatment, by brivanib, a VEGFR/FGFR inhibitor [9].

When this study was designed, no effective treatment for advanced HCC was available. Nonetheless, doxorubicin chemotherapy was common practice and it was sometimes employed as control treatment in phase III clinical trials [3]. Tamoxifen [10], polychemotherapy [11], and nolatrexed [3] all failed to demonstrate any survival advantage over doxorubicin, and therefore only supportive care was recommended [1]. For this reason, we adopted doxorubicin as a benchmark for measuring the effect of capecitabine on PFS.

The SHARP [7] and the Asia-Pacific [8] trials dramatically changed this scenario. Sorafenib was associated with a statistically significant survival improvement, so that it is now considered as the standard treatment of advanced HCC patients with preserved liver function. However, the absolute advantage is unsatisfactory (2.8 months among Western patients; 2.3 months among Asians) and is achieved at the expense of frequent toxicity. In fact, up to 38% of patients discontinue treatment because of adverse events, and up to 26% require a dose reduction. HCC has a high angiogenic activity driven especially by VEGF [12]. The favorable effects of sorafenib on tumor vascularization and disease progression are rapidly lost after treatment withdrawal, and a rebound in tumor growth can also be expected, which could be a class effect [13–16]. A brief course of treatment could also switch tumors to a more aggressive phenotype characterized by locally infiltrative growth and enhanced metastatic spread, as suggested by some studies [17–19]. Currently, no alternative drugs have been proven effective for HCC treatment, and many clinical trials to achieve this goal are in progress. Clinical research to identify more-effective and/or better-tolerated drugs is definitely warranted. Even conventional anticancer drugs exhibit an antiangiogenic effect, maximized by frequent and continuous administration, even daily. The target is switched from tumor cells to circulating endothelial cells and their precursors. This metronomic approach is characterized by good tolerability and can be conveniently put in practice with orally active drugs [20].

Capecitabine has been shown to have some clinical activity in advanced HCC [6, 21]. Theoretically, metronomic capecitabine could add to its antiangiogenic activity a direct antitumor effect.

Our results show that metronomic chemotherapy could be potentially interesting in the HCC setting. In fact, in addition to the results on patient survival, we confirmed the good toxicity profile of this approach even in a cirrhotic population: no treatment-related death was observed, and no patient withdrew from treatment due to AEs. Among them, nausea, diarrhea, hand-foot skin reaction, and mucositis can be considered drug-related, given capecitabine's toxicity profile [22]. However, they were mild or moderate in most cases, requiring only supportive care or brief drug-free periods. Instead, other AEs were probably related to the liver function decline rather than to capecitabine (Table 4 and 5). The incidence of AEs was not grossly different between first-line and second-line cohorts. Although the lack of difference could be due to the small sample size of the study, metronomic capecitabine is supposed to be well tolerated irrespective of previous sorafenib treatment.

Besides capecitabine, other orally active fluoropyrimidines administered with metronomic schedules have shown activity against HCC cells. Actually, metronomic uracil/tegafur (UFT) significantly postpones the onset of resistance to sorafenib [23], and metronomic S-1, alone or in combination with the targeted antiangiogenic drug vandetanib, prolongs survival without overt toxicities in mouse models of HCC [24]. A phase II trial of sorafenib plus metronomic UFT in Asian patients also showed that this combination is well tolerated and improves sorafenib efficacy [25].

In conclusion, metronomic capecitabine is a safe and likely active treatment in cirrhotic patients with preserved liver function and advanced HCC. The results of our study, as well as of previous seminal studies claim further investigations on this anticancer drug, alone or in combination with targeted antiangiogenic treatment.

## Reference

1. Bruix J, Sherman M, AASLD Practice Guidelines Committee. Management of hepatocellular carcinoma. *Hepatology* 2005;**42**:1208–1236.
2. Abou-Alfa GK, Schwartz L, Ricci S et al. Phase II study of sorafenib in patients with advanced hepatocellular carcinoma. *J Clin Oncol* 2006;**24**:4293–4300.
3. Gish RG, Porta C, Lazar L et al. Phase III randomized controlled trial comparing the survival of patients with unresectable hepatocellular carcinoma treated with nolatrexed or doxorubicin. *J Clin Oncol* 2007;**25**:3069–3075.
4. Lawless JF. *Statistical Models and Methods for Lifetime Data*. Wiley series in probability and mathematical statistics. John Wiley & Sons, New York, 1st edition 1982.
5. Santi V, Buccione D, Di Micoli A et al. The changing scenario of hepatocellular carcinoma over the last two decades in Italy. *J Hepatol*. 2012 Feb;**56**(2):397–405.
6. Von Delius S, Lersch C, Mayr M et al. Capecitabine for treatment of advanced hepatocellular carcinoma. *Hepatogastroenterology* 2007;**54**:2310–2314.
7. Llovet JM, Ricci S, Mazzaferro V et al. Sorafenib in advanced hepatocellular carcinoma. *N Engl J Med* 2008;**359**:378–390.
8. Cheng AL, Kang YK, Chen Z et al. Efficacy and safety of sorafenib in patients in the Asia-Pacific region with advanced hepatocellular carcinoma: a phase III randomised, double-blind, placebo-controlled trial. *Lancet Oncol* 2009;**10**:25–34.
9. Finn RS, Kank YK, Mulcahy M et al. Phase II, Open-Label Study of Brivanib as Second-Line Therapy in Patients with Advanced Hepatocellular Carcinoma. *Clin Cancer Res* 2012;**18**:2090–2098.
10. Nowak A, Findlay M, Culjak G et al. Tamoxifen for hepatocellular carcinoma. *Cochrane Database Syst Rev* 2004; CD001024.
11. Yeo W, Mok TS, Zee B et al. A randomized phase III study of doxorubicin versus cisplatin/interferon alpha-2b/doxorubicin/fluorouracil (PIAF) combination chemotherapy for unresectable hepatocellular carcinoma. *J Natl Cancer Inst* 2005;**97**:1532–1538.
12. Pang RWC, Poon RTP. From molecular biology to targeted therapies for hepatocellular carcinoma: the future is now. *Oncology* 2007;**72**:30–44.
13. Wolter P, Beuselinc B, Pans S et al. Flare-up: an often unreported phenomenon nevertheless familiar to oncologists prescribing tyrosine kinase inhibitors. *Acta Oncol* 2009;**48**:621–624.
14. Desar IME, Mulder SF, Stillebroer AB et al. The reverse side of the victory: flare up of symptoms after discontinuation of sunitinib or sorafenib in renal cell cancer patients. A report of three cases. *Acta Oncol* 2009;**48**:927–931.
15. Cacheux W, Boisserie T, Staudacher L et al. Reversible tumor growth acceleration following bevacizumab interruption in metastatic colorectal cancer patients scheduled for surgery. *Ann Oncol* 2008;**19**:1659–1661.
16. Stein WD, Yang J, Bates SE et al. Bevacizumab reduces the growth rate constants of renal carcinomas: a novel algorithm suggests early discontinuation of bevacizumab resulted in a lack of survival advantage. *Oncologist* 2008;**13**:1055–1062.
17. Pàez-Ribes M, Allen E, Hudock J et al. Antiangiogenic therapy elicits malignant progression of tumors to increased local invasion and distant metastasis. *Cancer Cell* 2009;**15**:220–231.
18. Ebos JML, Lee CR, Cruz-Munoz W et al. Accelerated metastasis after short-term treatment with a potent inhibitor of tumor angiogenesis. *Cancer Cell* 2009;**15**:232–239.
19. Dufour JF. The evasive promise of antiangiogenic therapy. *J Hepatol* 2009;**51**:970–972.
20. Kerbel RS, Kamen BA. The anti-angiogenic basis of metronomic chemotherapy. *Nat Rev Cancer* 2004;**4**:423–436.
21. Patt YZ, Hassan MM, Aguayo A et al. Oral capecitabine for the treatment of hepatocellular carcinoma, cholangiocarcinoma, and gallbladder carcinoma. *Cancer* 2004;**101**:578–586.
22. Mikhail SE, Sun JF, Marshall JL. Safety of capecitabine: a review. *Expert Opin Drug Saf* 2010;**9**:831–841.
23. Tang TC, Man S, Xu P et al. Development of a resistance-like phenotype to sorafenib by human hepatocellular carcinoma cells is reversible and can be delayed by metronomic UFT chemotherapy. *Neoplasia* 2010;**12**:928–940.
24. Iwamoto H, Torimura T, Nakamura T et al. Metronomic S-1 chemotherapy and vandetanib: an efficacious and nontoxic treatment for hepatocellular carcinoma. *Neoplasia* 2011;**13**:187–197.
25. Hsu CH, Shen YC, Lin ZZ et al. Phase II study of combining sorafenib with metronomic tegafur/uracil for advanced hepatocellular carcinoma. *J Hepatol* 2010;**53**:126–131.

## Figures and Tables

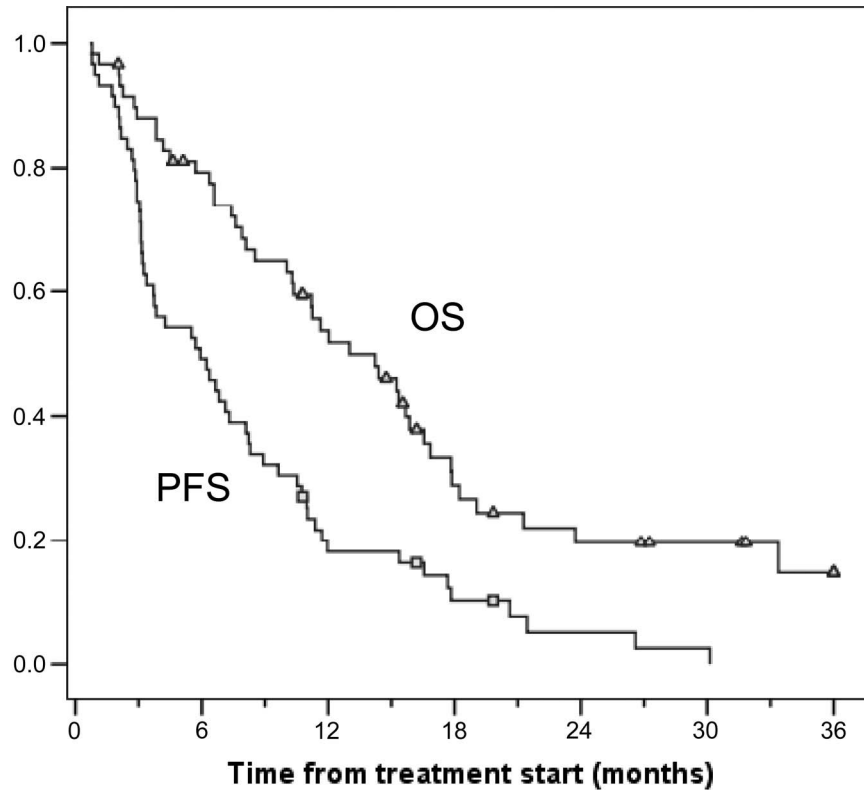

| At risk      | 0 m | 6 m | 12 m | 18 m | 24 m | 30 m | 36 m |
|--------------|-----|-----|------|------|------|------|------|
| OS <i>n</i>  | 59  | 44  | 28   | 13   | 8    | 6    | 3    |
| PFS <i>n</i> | 59  | 29  | 10   | 5    | 2    | 1    | 0    |

**Figure 1.** Kaplan-Meier plot of PFS and OS for the first-line treatment cohort. The squares and triangles signify the censored patients in a group (squares) and in the other group (triangles) on the different curves.

Abbreviations: *n*, number of patients; OS, overall survival; PFS, progression-free survival.



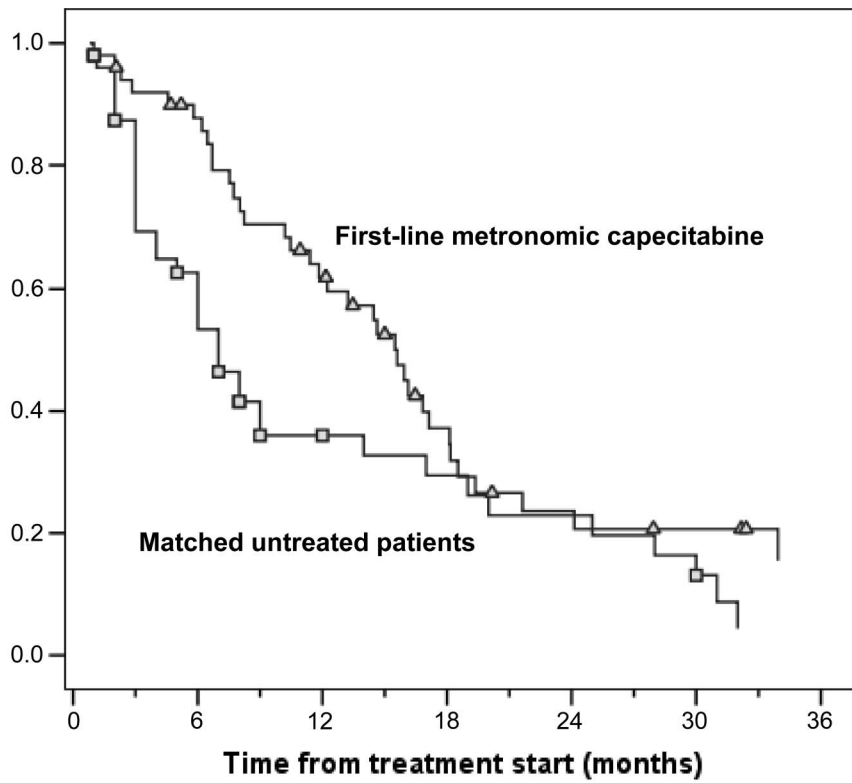

| At risk               | 0 m | 6 m | 12 m | 18 m | 24 m | 30 m | 36 m |
|-----------------------|-----|-----|------|------|------|------|------|
| Capecitabine <i>n</i> | 50  | 41  | 28   | 14   | 8    | 6    | 3    |
| Controls <i>n</i>     | 50  | 27  | 12   | 9    | 7    | 5    | 1    |

**Figure 2.** Kaplan-Meier plot of overall survival for 50 patients in the first-line treatment cohort and individually matched untreated patients from the Italian Liver Cancer (ITA.LI.CA) database. The squares and triangles signify the censored patients in a group (squares) and in the other group (triangles) on the different curves.

Abbreviation: *n*, number of patients.

**Table 1.** Characteristics of the 59 patients who received metronomic capecitabine as first-line treatment.

| Characteristic                 | N  | %          |
|--------------------------------|----|------------|
| <b>Age</b>                     |    |            |
| Median (Range)                 |    | 67 (44–88) |
| ≤65                            | 25 | 42         |
| >65                            | 34 | 58         |
| <b>Sex</b>                     |    |            |
| Male                           | 48 | 81         |
| Female                         | 11 | 19         |
| <b>ECOG performance status</b> |    |            |
| 0                              | 27 | 46         |
| 1                              | 32 | 54         |
| <b>Alpha-fetoprotein</b>       |    |            |
| ≤400 ng/ml                     | 35 | 59         |
| >400 ng/ml                     | 24 | 41         |
| <b>Cirrhosis etiology</b>      |    |            |
| HBV infection                  | 9  | 15         |
| HCV infection                  | 40 | 68         |
| Alcohol abuse                  | 12 | 20         |
| Other                          | 3  | 5          |
| Noncirrhotic liver             | 2  | 3          |
| <b>Number of HCC nodules</b>   |    |            |
| ≤5                             | 30 | 51         |
| 6–10                           | 12 | 20         |
| >10                            | 17 | 29         |
| <b>BCLC stage</b>              |    |            |
| B                              | 26 | 44         |
| C                              | 33 | 56         |
| <b>CLIP score</b>              |    |            |
| 0                              | 4  | 7          |
| 1                              | 19 | 32         |
| 2                              | 26 | 44         |
| 3                              | 8  | 14         |
| 4                              | 2  | 3          |
| <b>Vascular invasion</b>       |    |            |
| Absent                         | 36 | 61         |
| Present                        | 23 | 39         |
| <b>Metastatic spread</b>       |    |            |
| Absent                         | 44 | 75         |
| Present                        | 15 | 25         |
| <b>Previous treatments</b>     |    |            |
| None                           | 17 | 29         |
| Surgery                        | 20 | 34         |
| Locoregional treatments        | 37 | 63         |

**Table 2.** Characteristics of the 31 patients who received metronomic capecitabine after sorafenib failure.

| Characteristic                          | N  | %          |
|-----------------------------------------|----|------------|
| <b>Age</b>                              |    |            |
| Median (Range)                          |    | 71 (37–86) |
| ≤65                                     | 9  | 29         |
| >65                                     | 22 | 71         |
| <b>Sex</b>                              |    |            |
| Male                                    | 25 | 81         |
| Female                                  | 6  | 19         |
| <b>ECOG performance status</b>          |    |            |
| 0                                       | 13 | 42         |
| 1                                       | 18 | 58         |
| <b>Alpha-fetoprotein</b>                |    |            |
| ≤400 ng/ml                              | 18 | 58         |
| >400 ng/ml                              | 13 | 42         |
| <b>Cirrhosis etiology</b>               |    |            |
| HBV infection                           | 4  | 13         |
| HCV infection                           | 22 | 71         |
| Alcohol abuse                           | 4  | 13         |
| Other                                   | 4  | 13         |
| Noncirrhotic liver                      | 1  | 3          |
| <b>Number of HCC nodules</b>            |    |            |
| ≤5                                      | 4  | 13         |
| 6–10                                    | 10 | 32         |
| >10                                     | 17 | 55         |
| <b>BCLC stage</b>                       |    |            |
| B                                       | 15 | 48         |
| C                                       | 16 | 52         |
| <b>CLIP score</b>                       |    |            |
| 0                                       | 0  | 0          |
| 1                                       | 11 | 35         |
| 2                                       | 11 | 35         |
| 3                                       | 8  | 27         |
| 4                                       | 1  | 3          |
| <b>Vascular invasion</b>                |    |            |
| Absent                                  | 20 | 65         |
| Present                                 | 11 | 35         |
| <b>Metastatic spread</b>                |    |            |
| Absent                                  | 20 | 65         |
| Present                                 | 11 | 35         |
| <b>Previous treatments</b>              |    |            |
| Surgery                                 | 11 | 35         |
| Loco-regional treatments                | 24 | 77         |
| Sorafenib                               | 31 | 100        |
| <b>Sorafenib discontinuation reason</b> |    |            |
| Progressive disease                     | 19 | 61         |
| Intolerance                             | 12 | 39         |

**Table 3.** Clinical covariates distribution for the 50 matched patients treated with metronomic capecitabine and their individual controls from the ITA.LI.CA database.

| Variable                  | Capecitabine<br>(n = 50) | No treatment<br>(n = 50) | p      |
|---------------------------|--------------------------|--------------------------|--------|
| Median age (range)        | 67.5 (23–84)             | 67.0 (44–88)             | 0.259  |
| Male sex                  | 40 (80.0%)               | 35 (70.0%)               | 0.356  |
| HBV infection             | 9 (18.0%)                | 11 (22.0%)               | 0.803  |
| HCV infection             | 35 (70.0%)               | 34 (68.1%)               | 0.829  |
| Alcohol abuse             | 11 (22.0%)               | 11 (22.0%)               | >0.999 |
| Diffuse HCC               | 17 (34.0%)               | 17 (34.0%)               | >0.999 |
| Presence of metastases    | 6 (12.0%)                | 6 (12.0%)                | >0.999 |
| Portal vein thrombosis    | 19 (38.0%)               | 19 (38.0%)               | >0.999 |
| BCLC Stage Advanced       | 25 (50.0%)               | 25 (50.0%)               | >0.999 |
| Median CLIP score (range) | 2 (0–4)                  | 2 (0–4)                  | 0.708  |

**Table 4.** Recurrent adverse events observed among the 59 patients who received capecitabine as first-line treatment.

| Event                   | All grades |      | Grade 3–4 |     |
|-------------------------|------------|------|-----------|-----|
|                         | N          | %    | N         | %   |
| Anemia                  | 3          | 5.1  | 2         | 3.4 |
| Ascites                 | 4          | 6.8  | 3         | 5.1 |
| Fatigue                 | 14         | 23.7 | 2         | 3.4 |
| AST/ALT elevation       | 3          | 5.1  | 1         | 1.7 |
| Weight loss             | 3          | 5.1  | 0         | 0   |
| Limb edema              | 7          | 11.9 | 1         | 1.7 |
| Hepatic encephalopathy  | 3          | 5.1  | 1         | 1.7 |
| Epigastric pain         | 7          | 11.9 | 1         | 1.7 |
| Skin rash               | 4          | 6.7  | 0         | 0   |
| Bilirubin elevation     | 6          | 10.2 | 5         | 8.5 |
| Mucositis               | 4          | 6.8  | 0         | 0   |
| Fainting                | 3          | 5.1  | 3         | 5.1 |
| Hand-foot skin reaction | 10         | 16.9 | 0         | 0   |
| Thrombocytopenia        | 4          | 6.8  | 3         | 5.1 |

**Table 5.** Recurrent adverse events observed among the 31 patients who received capecitabine as second-line treatment.

| Event                   | All grades |      | Grade 3–4 |     |
|-------------------------|------------|------|-----------|-----|
|                         | N          | %    | N         | %   |
| Diarrhea                | 2          | 6.5  | 0         | 0   |
| Anemia                  | 5          | 16.1 | 2         | 6.5 |
| Fatigue                 | 11         | 35.5 | 0         | 0   |
| Pruritus                | 4          | 12.9 | 0         | 0   |
| Hand-foot skin reaction | 3          | 9.7  | 0         | 0   |
| Weight loss             | 3          | 9.7  | 0         | 0   |
| Deep vein thrombosis    | 2          | 6.5  | 2         | 6.5 |
| Nausea                  | 3          | 9.7  | 3         | 9.7 |
| Epigastric pain         | 2          | 6.5  | 2         | 6.5 |
| Bilirubin elevation     | 2          | 6.5  | 1         | 3.2 |
| Ascites                 | 3          | 9.7  | 3         | 9.7 |
| Thrombocytopenia        | 2          | 6.5  | 1         | 3.2 |

[Click here](#) to access other published clinical trials.

---
